# Supplementary material for: Frequency of Circulating B Cell Subpopulations in Umbilical Cord Blood and Adult Venous Blood
Source: Preprints.org preprint supplement (doi:10.20944/preprints202306.0989.v1), 2023-06-14
Supplement: Supplementary file 1 [file supplementary]

**Supplemental Table 1.** List of antibodies used for flow cytometry analysis. FITC - fluoresceinisothiocyanat; PE - Phycoerythrin; PerCP - Peridinin-chlorophyll-protein; Cy5 - Cyanin 5.5; APC – Allophycocyanin

| **Fluorochrome** | **antibody** | **clone** |
| --- | --- | --- |
| **FITC** | α-IgD | IA6-2 |
| α-CD27 | M-T271 |
| α-CD20 | 2H7 |
| **PE** | α-CD27 | M-T271 |
| α-CD19 | HIB19 |
| α-CD69 | L78 |
| **PerCP** | α-CD27 | M.T271 |
| **PerCP-Cy5** | α-IgM | MHM-88 |
| **APC** | α-CD19 | SJ25C1 |
| α-CD43 | 1G10 |
| α-CD38 | HIT2 |

**Supplemental Table 2.** Definition of B cell subpopulations

|  | **CD19** | **CD27** | **IgM** | **IgD** | **CD38** | **CD20** | **CD43** | **CD69** |
| --- | --- | --- | --- | --- | --- | --- | --- | --- |
| **immature  B cells** | + | + | + | - |  |  |  |  |
| **naïve  B cells** | + | - | - | - |  |  |  |  |
| **marginal zone  B cells** | + | + | + | + |  |  |  |  |
| **class switched memory B cells** | + | + | - | - |  |  |  |  |
| **IgM memory  B cells** | + | + | + | - |  |  |  |  |
| **transitional  B cells** | + | - | + |  | + |  |  |  |
| **plasma- blasts** | + | + | - |  | + + |  |  |  |
| **B1 cells** |  | + |  |  |  | + | + | - |
